# Supplementary material
Source: PubMed Central journal article supplement (PMC6422000)
Supplement: Supp_Table1.pdf [file Supp_Table1.pdf]

## Supplementary Data

SUPPLEMENTARY TABLE S1. MATERNAL AND INFANT CHARACTERISTICS BY YEAR CATEGORIES FOR MOTHER-INFANT DYADS AT BOSTON MEDICAL CENTER 2006–2016

|                                                    | <i>Period 1</i><br>01/2006–12/2009 | <i>Period 2</i><br>01/2010–12/2012 | <i>Period 3</i><br>01/2013–03/2015 | <i>Period 4</i><br>04/2015–12/2016 | p <sup>a</sup> |
|----------------------------------------------------|------------------------------------|------------------------------------|------------------------------------|------------------------------------|----------------|
| Maternal pregnancy characteristics [ <i>n</i> (%)] |                                    |                                    |                                    |                                    |                |
| Age                                                |                                    |                                    |                                    |                                    | 0.01           |
| <25 years                                          | 45 (32.9)                          | 54 (29.7)                          | 26 (24.5)                          | 22 (15.8)                          |                |
| 25–34 years                                        | 76 (55.5)                          | 115 (63.2)                         | 66 (62.3)                          | 96 (69.1)                          |                |
| ≥35 years                                          | 16 (11.7)                          | 13 (7.1)                           | 14 (13.2)                          | 21 (15.1)                          |                |
| Non-Hispanic white race/ethnicity                  | 123 (89.8)                         | 165 (90.7)                         | 88 (83.0)                          | 118 (84.9)                         | 0.01           |
| Public insurance (Medicaid)                        | 132 (97.1)                         | 158 (91.3)                         | 99 (94.3)                          | 132 (95.7)                         | 0.36           |
| Any hypertension                                   | 20 (14.6)                          | 20 (11.0)                          | 14 (13.2)                          | 42 (30.2)                          | 0.13           |
| Any smoking                                        | 110 (80.3)                         | 141 (77.5)                         | 80 (75.5)                          | 100 (74.1)                         | 0.86           |
| Opioid agonist therapy                             |                                    |                                    |                                    |                                    | 0.01           |
| Methadone                                          | 109 (79.6)                         | 79 (43.4)                          | 50 (47.2)                          | 65 (46.8)                          |                |
| Buprenorphine                                      | 28 (20.4)                          | 103 (56.6)                         | 56 (52.8)                          | 74 (53.2)                          |                |
| Any psychiatric diagnosis                          | 84 (61.3)                          | 115 (63.5)                         | 76 (75.3)                          | 118 (84.9)                         | <.0001         |
| Any psychiatric medication                         | 56 (40.9)                          | 96 (52.8)                          | 49 (46.2)                          | 47 (33.8)                          | 0.01           |
| Hepatitis C                                        | 88 (64.2)                          | 120 (65.9)                         | 63 (59.4)                          | 75 (55.2)                          | 0.26           |
| Mode of delivery                                   |                                    |                                    |                                    |                                    | 0.40           |
| Vaginal                                            | 84 (61.3)                          | 118 (64.8)                         | 73 (68.9)                          | 82 (59.0)                          |                |
| Cesarean                                           | 53 (38.7)                          | 64 (35.2)                          | 33 (31.1)                          | 57 (41.0)                          |                |
| Infant characteristics [ <i>n</i> (%)]             |                                    |                                    |                                    |                                    |                |
| Gestational age                                    |                                    |                                    |                                    |                                    | 0.29           |
| ≤33 6/7 weeks                                      | 7 (5.1)                            | 9 (5.0)                            | 1 (0.9)                            | 6 (4.3)                            |                |
| 34 0/7–36 6/7 weeks                                | 18 (13.1)                          | 17 (9.3)                           | 7 (6.6)                            | 11 (7.9)                           |                |
| ≥37 0/7 weeks                                      | 112 (81.8)                         | 156 (85.7)                         | 98 (92.5)                          | 122 (87.8)                         |                |
| Birth weight (grams)                               |                                    |                                    |                                    |                                    | 0.18           |
| <2500                                              | 31 (22.6)                          | 28 (15.4)                          | 14 (13.2)                          | 21 (15.1)                          |                |
| ≥2500                                              | 106 (77.4)                         | 154 (84.6)                         | 92 (86.8)                          | 118 (84.9)                         |                |
| Received any breastmilk? (%yes)                    | 49 (35.8)                          | 82 (45.1)                          | 67 (63.2)                          | 85 (61.2)                          |                |
| Length of stay (days) [Mean (SD)]                  | 22.4 (12.4)                        | 18.58 (12.1)                       | 18.3 (10.3)                        | 17.0 (11.8)                        | 0.002          |

<sup>a</sup>Chi-Squared for categorical variables, *t*-test for continuous variables.  
SD, standard deviation.
