# Supplementary material
Source: PubMed Central journal article supplement (PMC6422000)
Supplement: Supp_Table2.pdf [file Supp_Table2.pdf]

SUPPLEMENTARY TABLE S2. UNADJUSTED ASSOCIATIONS OF PHARMACOTHERAPY WITH BREASTFEEDING INITIATION BY DELIVERY TIME PERIOD

|                         | <i>01/2006–12/2009</i><br>n = 137<br><i>aOR (95% CI)</i> | <i>01/2010–12/2012</i><br>n = 182<br><i>aOR (95% CI)</i> | <i>01/2013–03/2015</i><br>n = 106<br><i>aOR (95% CI)</i> | <i>04/2015–12/2016</i><br>n = 144<br><i>aOR (95% CI)</i> |
|-------------------------|----------------------------------------------------------|----------------------------------------------------------|----------------------------------------------------------|----------------------------------------------------------|
| Buprenorphine treatment | 4.53 (1.88–10.90) <sup>a</sup>                           | 1.16 (0.64–2.08)                                         | 1.30 (0.59–2.86)                                         | 1.10 (0.55–2.17)                                         |
| Methadone treatment     | Ref.                                                     | Ref.                                                     | Ref.                                                     | Ref.                                                     |

<sup>a</sup>*p*-value <0.05.

aOR, adjusted odds ratio; CI, confidence interval.
